# Supplementary material for: Lys417 acts as a molecular switch that regulates the conformation of SARS-CoV-2 spike protein
Source: eLife. 2023 Nov 22;12:e74060. doi: 10.7554/eLife.74060 (PMC10695562; doi:10.7554/eLife.74060)
Supplement: Figure 3—source data 2. [file elife-74060-fig3-data2.xlsx]

## Sheet: Sheet1
Figure 3B	Flow cytometry data
Depth	Name	Statistic	#Cells
	Specimen_001_ctrl-stain.fcs		10000
>	Specimen_001_ctrl-stain.fcs/main	76.2	7620
> >	Specimen_001_ctrl-stain.fcs/main/Single Cells	97.7	7448
> > >	Specimen_001_ctrl-stain.fcs/main/Single Cells/Q1: Alexa Fluor 488-A- , PE-A+	0.067	5
> > >	Specimen_001_ctrl-stain.fcs/main/Single Cells/Q2: Alexa Fluor 488-A+ , PE-A+	0.027	2
> > >	Specimen_001_ctrl-stain.fcs/main/Single Cells/Q3: Alexa Fluor 488-A+ , PE-A-	2.48	185
> > >	Specimen_001_ctrl-stain.fcs/main/Single Cells/Q4: Alexa Fluor 488-A- , PE-A-	97.4	7256
	Specimen_001_ctrl-s1.fcs		20000
>	Specimen_001_ctrl-s1.fcs/main	76.3	15257
> >	Specimen_001_ctrl-s1.fcs/main/Single Cells	97.7	14912
> > >	Specimen_001_ctrl-s1.fcs/main/Single Cells/Q1: Alexa Fluor 488-A- , PE-A+	0.06	9
> > >	Specimen_001_ctrl-s1.fcs/main/Single Cells/Q2: Alexa Fluor 488-A+ , PE-A+	0.027	4
> > >	Specimen_001_ctrl-s1.fcs/main/Single Cells/Q3: Alexa Fluor 488-A+ , PE-A-	2.57	383
> > >	Specimen_001_ctrl-s1.fcs/main/Single Cells/Q4: Alexa Fluor 488-A- , PE-A-	97.3	14516
	Specimen_001_ctrl-s2.fcs		20000
>	Specimen_001_ctrl-s2.fcs/main	75.9	15183
> >	Specimen_001_ctrl-s2.fcs/main/Single Cells	97.7	14833
> > >	Specimen_001_ctrl-s2.fcs/main/Single Cells/Q1: Alexa Fluor 488-A- , PE-A+	0.1	15
> > >	Specimen_001_ctrl-s2.fcs/main/Single Cells/Q2: Alexa Fluor 488-A+ , PE-A+	0.034	5
> > >	Specimen_001_ctrl-s2.fcs/main/Single Cells/Q3: Alexa Fluor 488-A+ , PE-A-	2.43	360
> > >	Specimen_001_ctrl-s2.fcs/main/Single Cells/Q4: Alexa Fluor 488-A- , PE-A-	97.4	14453
	Specimen_001_WT-1-1.fcs		20000
>	Specimen_001_WT-1.fcs/main	65.5	13103
> >	Specimen_001_WT-1.fcs/main/Single Cells	95.1	12467
> > >	Specimen_001_WT-1.fcs/main/Single Cells/Q1: Alexa Fluor 488-A- , PE-A+	8.88	1107
> > >	Specimen_001_WT-1.fcs/main/Single Cells/Q2: Alexa Fluor 488-A+ , PE-A+	33	4108
> > >	Specimen_001_WT-1.fcs/main/Single Cells/Q3: Alexa Fluor 488-A+ , PE-A-	5.25	655
> > >	Specimen_001_WT-1.fcs/main/Single Cells/Q4: Alexa Fluor 488-A- , PE-A-	52.9	6597
	Specimen_001_WT-2.fcs		20000
>	Specimen_001_WT-2.fcs/main	65.4	13084
> >	Specimen_001_WT-2.fcs/main/Single Cells	95.6	12504
> > >	Specimen_001_WT-2.fcs/main/Single Cells/Q1: Alexa Fluor 488-A- , PE-A+	8.33	1042
> > >	Specimen_001_WT-2.fcs/main/Single Cells/Q2: Alexa Fluor 488-A+ , PE-A+	31.3	3919
> > >	Specimen_001_WT-2.fcs/main/Single Cells/Q3: Alexa Fluor 488-A+ , PE-A-	4.79	599
> > >	Specimen_001_WT-2.fcs/main/Single Cells/Q4: Alexa Fluor 488-A- , PE-A-	55.5	6944
	Specimen_001_WT-3.fcs		20000
>	Specimen_001_WT-3.fcs/main	65.6	13115
> >	Specimen_001_WT-3.fcs/main/Single Cells	95.2	12489
> > >	Specimen_001_WT-3.fcs/main/Single Cells/Q1: Alexa Fluor 488-A- , PE-A+	9.18	1147
> > >	Specimen_001_WT-3.fcs/main/Single Cells/Q2: Alexa Fluor 488-A+ , PE-A+	31.7	3956
> > >	Specimen_001_WT-3.fcs/main/Single Cells/Q3: Alexa Fluor 488-A+ , PE-A-	5.18	647
> > >	Specimen_001_WT-3.fcs/main/Single Cells/Q4: Alexa Fluor 488-A- , PE-A-	54	6739
	Specimen_001_V417-1.fcs		20000
>	Specimen_001_V417-1.fcs/main	76.6	15314
> >	Specimen_001_V417-1.fcs/main/Single Cells	96	14697
> > >	Specimen_001_V417-1.fcs/main/Single Cells/Q1: Alexa Fluor 488-A- , PE-A+	6.27	922
> > >	Specimen_001_V417-1.fcs/main/Single Cells/Q2: Alexa Fluor 488-A+ , PE-A+	50.3	7396
> > >	Specimen_001_V417-1.fcs/main/Single Cells/Q3: Alexa Fluor 488-A+ , PE-A-	2.32	341
> > >	Specimen_001_V417-1.fcs/main/Single Cells/Q4: Alexa Fluor 488-A- , PE-A-	41.1	6038
	Specimen_001_V417-2.fcs		20000
>	Specimen_001_V417-2.fcs/main	76.3	15255
> >	Specimen_001_V417-2.fcs/main/Single Cells	96.2	14680
> > >	Specimen_001_V417-2.fcs/main/Single Cells/Q1: Alexa Fluor 488-A- , PE-A+	6.53	959
> > >	Specimen_001_V417-2.fcs/main/Single Cells/Q2: Alexa Fluor 488-A+ , PE-A+	49.6	7274
> > >	Specimen_001_V417-2.fcs/main/Single Cells/Q3: Alexa Fluor 488-A+ , PE-A-	2.21	324
> > >	Specimen_001_V417-2.fcs/main/Single Cells/Q4: Alexa Fluor 488-A- , PE-A-	41.7	6123
	Specimen_001_V417-3.fcs		20000
>	Specimen_001_V417-3.fcs/main	76.4	15288
> >	Specimen_001_V417-3.fcs/main/Single Cells	96	14672
> > >	Specimen_001_V417-3.fcs/main/Single Cells/Q1: Alexa Fluor 488-A- , PE-A+	6.7	983
> > >	Specimen_001_V417-3.fcs/main/Single Cells/Q2: Alexa Fluor 488-A+ , PE-A+	50.4	7394
> > >	Specimen_001_V417-3.fcs/main/Single Cells/Q3: Alexa Fluor 488-A+ , PE-A-	2.39	350
> > >	Specimen_001_V417-3.fcs/main/Single Cells/Q4: Alexa Fluor 488-A- , PE-A-	40.5	5945
	Specimen_001_V417+FnM-1.fcs		20000
>	Specimen_001_V417+FnM-1.fcs/main	69.6	13922
> >	Specimen_001_V417+FnM-1.fcs/main/Single Cells	95.3	13262
> > >	Specimen_001_V417+FnM-1.fcs/main/Single Cells/Q1: Alexa Fluor 488-A- , PE-A+	4.03	535
> > >	Specimen_001_V417+FnM-1.fcs/main/Single Cells/Q2: Alexa Fluor 488-A+ , PE-A+	53	7026
> > >	Specimen_001_V417+FnM-1.fcs/main/Single Cells/Q3: Alexa Fluor 488-A+ , PE-A-	5.96	790
> > >	Specimen_001_V417+FnM-1.fcs/main/Single Cells/Q4: Alexa Fluor 488-A- , PE-A-	37	4911
	Specimen_001_V417+FnM-2.fcs		20000
>	Specimen_001_V417+FnM-2.fcs/main	69.8	13960
> >	Specimen_001_V417+FnM-2.fcs/main/Single Cells	95	13257
> > >	Specimen_001_V417+FnM-2.fcs/main/Single Cells/Q1: Alexa Fluor 488-A- , PE-A+	4.22	560
> > >	Specimen_001_V417+FnM-2.fcs/main/Single Cells/Q2: Alexa Fluor 488-A+ , PE-A+	53.1	7039
> > >	Specimen_001_V417+FnM-2.fcs/main/Single Cells/Q3: Alexa Fluor 488-A+ , PE-A-	5.94	788
> > >	Specimen_001_V417+FnM-2.fcs/main/Single Cells/Q4: Alexa Fluor 488-A- , PE-A-	36.7	4870
	Specimen_001_V417+FnM-3.fcs		20000
>	Specimen_001_V417+FnM-3.fcs/main	69.6	13924
> >	Specimen_001_V417+FnM-3.fcs/main/Single Cells	94.9	13216
> > >	Specimen_001_V417+FnM-3.fcs/main/Single Cells/Q1: Alexa Fluor 488-A- , PE-A+	3.76	497
> > >	Specimen_001_V417+FnM-3.fcs/main/Single Cells/Q2: Alexa Fluor 488-A+ , PE-A+	53.1	7019
> > >	Specimen_001_V417+FnM-3.fcs/main/Single Cells/Q3: Alexa Fluor 488-A+ , PE-A-	5.9	780
> > >	Specimen_001_V417+FnM-3.fcs/main/Single Cells/Q4: Alexa Fluor 488-A- , PE-A-	37.2	4920
	Specimen_001_FnM-1.fcs		20000
>	Specimen_001_FnM-1.fcs/main	81.2	16250
> >	Specimen_001_FnM-1.fcs/main/Single Cells	96.7	15716
> > >	Specimen_001_FnM-1.fcs/main/Single Cells/Q1: Alexa Fluor 488-A- , PE-A+	4.21	661
> > >	Specimen_001_FnM-1.fcs/main/Single Cells/Q2: Alexa Fluor 488-A+ , PE-A+	40.8	6415
> > >	Specimen_001_FnM-1.fcs/main/Single Cells/Q3: Alexa Fluor 488-A+ , PE-A-	2.41	378
> > >	Specimen_001_FnM-1.fcs/main/Single Cells/Q4: Alexa Fluor 488-A- , PE-A-	52.6	8262
	Specimen_001_FnM-2.fcs		20000
>	Specimen_001_FnM-2.fcs/main	81.2	16241
> >	Specimen_001_FnM-2.fcs/main/Single Cells	96.7	15706
> > >	Specimen_001_FnM-2.fcs/main/Single Cells/Q1: Alexa Fluor 488-A- , PE-A+	4.09	643
> > >	Specimen_001_FnM-2.fcs/main/Single Cells/Q2: Alexa Fluor 488-A+ , PE-A+	40.6	6374
> > >	Specimen_001_FnM-2.fcs/main/Single Cells/Q3: Alexa Fluor 488-A+ , PE-A-	2.39	375
> > >	Specimen_001_FnM-2.fcs/main/Single Cells/Q4: Alexa Fluor 488-A- , PE-A-	52.9	8314
	Specimen_001_FnM-3.fcs		20000
>	Specimen_001_FnM-3.fcs/main	81.4	16280
> >	Specimen_001_FnM-3.fcs/main/Single Cells	96.6	15720
> > >	Specimen_001_FnM-3.fcs/main/Single Cells/Q1: Alexa Fluor 488-A- , PE-A+	4.39	690
> > >	Specimen_001_FnM-3.fcs/main/Single Cells/Q2: Alexa Fluor 488-A+ , PE-A+	40.7	6396
> > >	Specimen_001_FnM-3.fcs/main/Single Cells/Q3: Alexa Fluor 488-A+ , PE-A-	2.49	392
> > >	Specimen_001_FnM-3.fcs/main/Single Cells/Q4: Alexa Fluor 488-A- , PE-A-	52.4	8242
