# Supplementary material for: Lys417 acts as a molecular switch that regulates the conformation of SARS-CoV-2 spike protein
Source: eLife. 2023 Nov 22;12:e74060. doi: 10.7554/eLife.74060 (PMC10695562; doi:10.7554/eLife.74060)
Supplement: Figure 3—source data 4. [file elife-74060-fig3-data4.xlsx]

## Sheet: Sheet1
Figure 3C	Pseudovirus data
	Read										%
	mock	934	1252	1238	1236	1086	1282	1466	1244		mock	0.784174	1.05116	1.03941	1.03773	0.911791	1.07635	1.23083	1.04445
	nCoV	155604	103242	110750	83532	143840	112210	105616	138056		nCoV	130.643	86.6806	92.9842	70.1323	120.766	94.21	88.6738	115.91
	nCoV-V	229910	197886	242416	215090	192878	188052	266072	218958		nCoV-V	193.029	166.142	203.529	180.587	161.938	157.886	223.39	183.834
