# Supplementary material for: Lys417 acts as a molecular switch that regulates the conformation of SARS-CoV-2 spike protein
Source: eLife journal article supplement (doi:10.7554/elife.74060), 2023-11-22

Extract from 2D classes

57,795 particles

Hetero refinement with 3 ab-initio maps in cryoSPARC

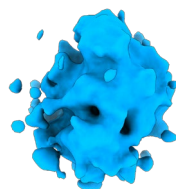

#1 (12.5%)

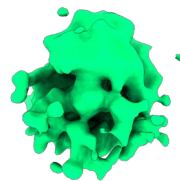

#2 (13.1%)

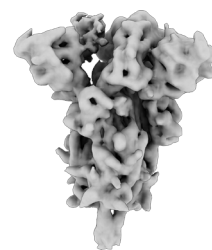

#3 (74.4%)

42,970 particles

Homogeneous, non-uniform and CTF refinements with C1 symmetry

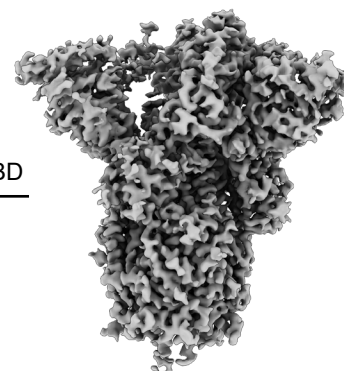

3.4 Å

Masking RBD

Masked 3D classification with signal subtraction in RELION, then revert to original particles for non-uniform refinement in cryoSPARC

19,305 particles

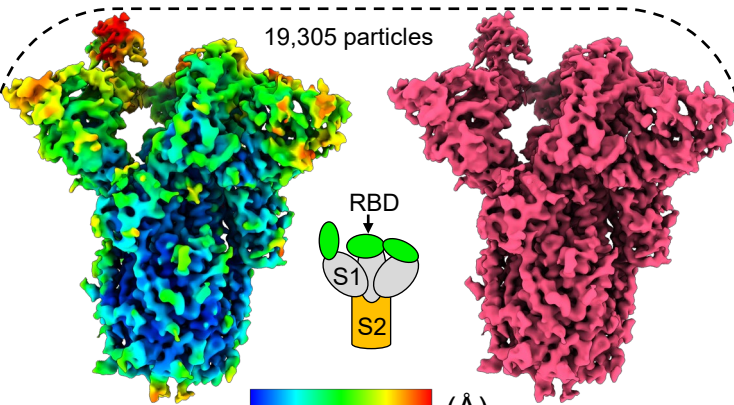

C1 symmetry

3.6 4.8 6.0 7.2 8.4 (Å)

GSFSC Resolution: 3.91Å

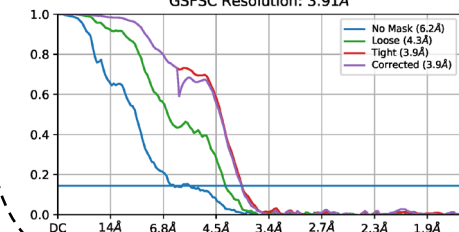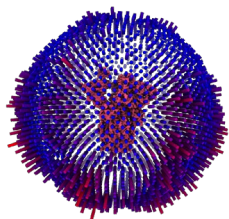

23,665 particles

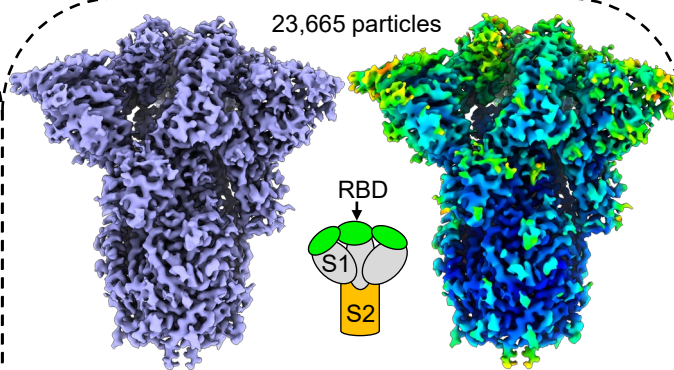

C3 symmetry

3.0 4.0 5.0 6.0 7.0 (Å)

GSFSC Resolution: 3.23Å

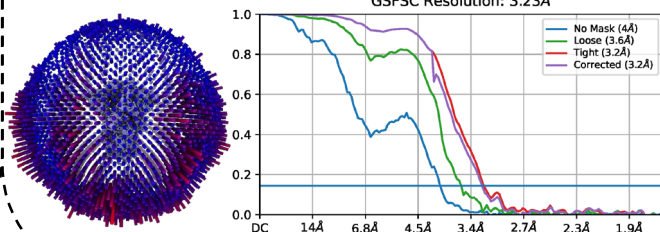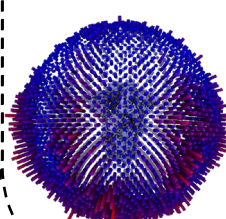

Supplement: supp [file elife-74060-supp-v2.zip]
